1 **Assessing antimicrobial resistance, utilization and stewardship in Yemen: An**  
2 **exploratory mixed-methods study.**

3 **Orubu ESF**<sup>1,2\*</sup> **Najwa A**<sup>3</sup>, **Ching C**<sup>2</sup>, **Bu Jawdeh S**<sup>2</sup>, **Anderson J**<sup>2</sup>, **Sheikh R**<sup>3</sup>, **Hariri F**  
4 <sup>4</sup>, **Basaleem H**<sup>5</sup>, **Zaman MH**<sup>2</sup>

5 <sup>1</sup>. Institute for Health System Innovation & Policy, Boston University, Boston, United States  
6 of America

7 <sup>2</sup>. Department of Biomedical Engineering, College of Engineering, Boston University,  
8 Boston, United States of America

9 <sup>3</sup>. Yemen Public Health Network, Aden, Yemen

10 <sup>4</sup>. Yemeni Pharmacovigilance Center, Aden, Yemen

11 <sup>5</sup>. Faculty of Medicine and Health Sciences, University of Aden, Yemen

12 \* Corresponding author. Email: [sforubu@bu.edu](mailto:sforubu@bu.edu)

13 Key words: antimicrobial resistance, stewardship, conflict

14

15

16

17

18 **Running Head: Antimicrobial resistance, use and stewardship in Yemen**

19

20

21 **NOTE: This preprint reports new research that has not been certified by peer review and should not be used to guide clinical practice.**

## 22 Abstract

23 Antimicrobial resistance (AMR), largely driven by irrational use of antimicrobials, is a  
24 global, multi-faceted problem calling for a complete understanding of all contributory factors  
25 for effective containment. In conflict settings, war-wounds and malnutrition can combine  
26 with existing social determinants to increase demand for antibiotics, compounding irrational  
27 use. In this study, we focus on Yemen, a low-income country with active conflict for the last  
28 five years, and analyze the current status of awareness and stewardship efforts regarding  
29 AMR. We performed a survey of prescribers/physicians and pharmacists to describe  
30 perceptions of AMR prevalence, antibiotic use practices and stewardship in Yemen,  
31 supported by a non-systematic scoping literature review and a key informant interview.  
32 Participants (96%, n=57) reported a perceived high AMR prevalence rate. Prescribers (74%,  
33 20/27) reported pressure to prescribe broad-spectrum antibiotics. In the majority of cases  
34 (81%, 22/27), Antimicrobial Sensitivity Tests (AST) were not performed to inform antibiotic  
35 choice. The main barrier to AST was cost. Most pharmacists (67%, 18/27) sold antibiotics  
36 without prescriptions. Amoxicillin (including amoxicillin-clavulanate) was the most-  
37 commonly prescribed (63%, 17/27) or dispensed (82%, 22/27) antibiotic. AST was rated the  
38 least important solution to AMR in Yemen. While there was awareness of a high AMR rate,  
39 stewardship is poor in Yemen. We note that barriers to the use of AST could be addressed  
40 through the deployment of low-cost AST kits. Compulsory continuing education emphasizing  
41 the use of AST to guide prescribing and patients' awareness programs could help avoid  
42 irrational use.

43

44

45

46

47

48

49

50

51

52

53

54

55

56

57

58

59

## 60 Introduction

61 Antimicrobial resistance (AMR) – the ability of disease-causing microorganisms such as  
62 bacteria to withstand therapeutic doses of an antimicrobial agent, leading to treatment  
63 failure/death – is a multi-dimensional biosocial problem affecting countries worldwide and  
64 requires urgent measures aimed at containment.<sup>1,2</sup> Low- and Middle-Income Countries  
65 (LMICs) are particularly projected to bear the greater impact of AMR.<sup>1</sup> This may be even  
66 more so in humanitarian and armed conflict contexts.<sup>3-5</sup>

67 While a natural adaptive strategy, AMR has been accelerated by anthropogenic factors  
68 promoting inappropriate use, including non-evidence based prescribing, or empirical  
69 prescribing, self-medication, non-adherence to prescribed dosages, use of Substandard and  
70 Falsified (SF) medicines and non-therapeutic uses in livestock.<sup>6-10</sup> Social determinants,  
71 including poor infection prevention and control practices, poor Water, Sanitation and  
72 Hygiene (WASH) infrastructure and lack of access to quality health services further  
73 exacerbate AMR, resulting in situations whereby antibiotics are used as substitutes for  
74 disease-preventive activities in some settings.<sup>9,11,12</sup> Overall, more than 50% of all antibiotic  
75 prescriptions are inappropriate, calling for better Antimicrobial Stewardship (AMS) to  
76 preserve efficacy<sup>13</sup>.

77 Specifically, in active conflicts, increased injuries associated with war wounds predisposing  
78 to AMR infections contribute additional contextual challenges.<sup>4,14-18</sup> Some studies report or  
79 suggest a high carriage of AMR and transmission among refugees and the forcibly displaced  
80 fleeing conflicts in five World Health Organization (WHO) Eastern Mediterranean Region  
81 countries.<sup>16,19</sup> Thus, conflicts aggregate multiple social determinants potentially promoting  
82 inappropriate antibiotic use and AMR.

83 Yemen, following upon upheavals arising from the Arab Spring in 2011 slipped into conflict  
84 in March 2015, and is now described as the world's largest humanitarian crisis.<sup>20</sup> In a  
85 population of 29.1 million in 2019, 24 million are in need of aid with about 3.3 million  
86 Internally Displaced Persons (IDPs). Access to healthcare, as well as to other services  
87 essential to life, remain limited. Since 2016, Yemen has been struggling with a cholera  
88 outbreak, leading to over 1.2 million cases as of January 2020; mostly in children under five  
89 <sup>21</sup>. Malnutrition in young children predisposing to infections is high.<sup>22,23</sup> Several studies  
90 already suggest a high AMR burden.<sup>24-30</sup> In 2018, for example, among patients admitted to  
91 the Médecins Sans Frontiers (MSF) hospital in Aden, more than 60% had a drug resistant  
92 infection.<sup>31</sup> These conditions coincide with the current COVID-19 pandemic to further  
93 exacerbate the problem.<sup>32</sup>

94 Understanding and accounting for contextual factors impacting AMR, including individual,  
95 social and national-level dimensions, is necessary for the design and implementation of  
96 successful containment programs. Globally, the WHO's Global Action Plan on AMR  
97 Containment, launched in 2015, articulates a strategic framework of actions. The follow-up  
98 2017 Access, Watch, Reserve (AWaRe) classification of antibiotics aims to promote rational  
99 use at the community-level. Both lay emphasis on Antimicrobial Sensitivity Tests (AST) to  
100 guide antimicrobial prescribing and prescription-only-sale of antibiotics as two  
101 complementary AMS approaches. In general, surveillance data on AMR prevalence and  
102 antimicrobial consumption inform country-level measures to contain AMR.

103 There are surveillance gaps for Yemen that lead to a poor understanding of AMR drivers and  
104 containment efforts. There are no records on national AMR prevalence on several databases  
105 including the WHO's GLASS, the PFIZER database and CDDEP resistance bank.<sup>33</sup> There is  
106 also no national action plan on AMR. Conflict and a weak National Health Information  
107 System make it difficult to access reliable, up-to-date data.

108 The aim of this exploratory mixed-method study was to assess current awareness and  
109 perceptions of AMR and AMS status in Yemen. The objectives were to: 1. assess perceptions  
110 on AMR prevalence, 2. assess antibiotic prescribing and dispensing practices, and 3. evaluate  
111 AMS activities, with a view to both understanding current challenges with AMR and to  
112 provide evidence for policy interventions.

## 113 **Methods**

114 Study design: The study employed a mixed-method study design. The mixed-method  
115 approach was judged appropriate to provide robust results; recognizing both the challenge of  
116 conducting research during conflicts in the middle of a pandemic and the need for accurate  
117 data. In designing, implementing and reporting this study, we adopted the mixed-method  
118 guidelines of Leech and Onwuegbuzie.<sup>34</sup> It utilized a combination of a literature review,  
119 questionnaire survey and a focused key stakeholder interview.

### 120 Literature review

121 To better understand the context and to evaluate our findings, we performed a targeted non-  
122 systematic literature review of grey, peer-reviewed and unpublished documents, reports and  
123 articles obtained from various sources. Documents selected *a priori* for evaluation included  
124 the National Essential Medicines List (EML). Peer-reviewed literature retrieved from a  
125 search on PubMed and Web of Science and reports identified from researchers' experience in  
126 Yemen from 1999 were selected and evaluated, with a focus on the time period from 2015-  
127 2020. Articles related to AMR prevalence, prescribing and dispensing practices, antibiotic  
128 use and use of AST in Yemen, as well as other relevant policies including prescribing  
129 guidelines were selected and data was subsequently extracted. Thus, the literature review was  
130 iterative – performed before the survey to guide questionnaire development and after the  
131 survey to triangulate survey findings as well as support the key stakeholder's interview to  
132 summarize and synthesis the current evidence.<sup>34</sup>

### 133 Survey

134 Study participants: Study participants were physicians in private and public facilities that  
135 prescribe medicines and pharmacists in private pharmacies.

136 Sample size: We targeted a sample size of 40-60, comprising at least 30 physicians and 10  
137 pharmacists, considered appropriate for a pilot or exploratory study.<sup>35,36</sup>

138 Study location: Facilities across Yemen, encompassing the “regional” north and south to  
139 account for the current administrative structures, comprising all five tiers of health units,  
140 health centers and hospitals (district, regional and central specialized). This dispersion  
141 allowed for a maximum variation sampling scheme to collect a wide range of perspectives.

142 Study instrument: Two different semi-structured questionnaires were used to collect data with  
143 tailored questions for healthcare workers/physicians and pharmacists (Appendix 1,

144 Supplement). Questions were based on a rational construct to scope perceptions, practices  
145 and AMS activities in the relevant facility type. The construct included selected aspects of  
146 AMS with a focus on rational prescribing – the use of guides, antibiotic choice, prescribing  
147 (or consumption) patterns, the presence of Drug and Therapeutic Committees (DTC) and  
148 AST derived from WHO guidelines.<sup>37,38</sup> The questionnaires contained four sections: (i)  
149 demographic information on both the clients of the facilities and participants; (ii) perceptions  
150 of the AMR burden and approaches aimed as solution; (iii) AMS; and (iii) practices related to  
151 antibiotic prescribing and dispensing, including the major antibiotics prescribed or dispensed.  
152 Questionnaires were made available in English and Arabic versions. Translations were  
153 provided by a proficient bilingual speaker (SB) and checked by a researcher (NA) who is also  
154 a proficient bilingual professional for accuracy, cultural suitability and content validity.

155 Survey administration and data collection: The questionnaires were distributed online for  
156 self-completion in August-September, 2020.

### 157 Key informant interview

158 The interview was conducted with a public official in Yemen Republic, to triangulate  
159 information from the survey and literature review; both to understand public policies and to  
160 provide contextual information. Questions were formulated based on the survey results. The  
161 pertinent questions asked the key informant were: What factors would improve the uptake of  
162 AST, the average cost of one AST, and policies around prescription guides and AMR. To  
163 improve data quality, we purposively identified and interviewed a high-ranking official.  
164 Using this politically-important case sampling strategy, we hoped to obtain accurate  
165 information on policies. The interview was conducted over the telephone using specific  
166 questions prepared in advance from survey findings.

167 Analysis: The results were analyzed by descriptive statistics and presented as percentages.  
168 Survey responses with incompletely or incorrectly filled variables were screened out before  
169 data analysis. Interview findings are reported qualitatively as received.

170 Ethics: Ethical clearance (REC-81-2020) was obtained from the Research Ethics Committee  
171 of the University of Aden – in line with similar studies – before questionnaires were  
172 distributed.<sup>24</sup>

## 173 **Results**

174 The survey response rate was 41% (57/140). There was a higher response rate among  
175 pharmacists (67%, 27/40) than among physicians (30%, 30/100). Following screening, three  
176 questionnaires were excluded from the physicians' responses. Total valid responses were,  
177 therefore, 54, comprising an equal number (27) of physicians and pharmacists.

178 Table 1 presents the results for the survey (Supplement). (Detailed demographic information  
179 is attached as Appendix 2 in Supplemental material).

### 180 AMR: prevalence and solutions

181 Participants were aware of a high AMR prevalence rate, if understudied/underreported.  
182 Almost all (96%, 52/57) reported AMR to be a problem in Yemen. The majority (56%, 15/27  
183 of physicians and 70%, 17/27 of pharmacists) perceived AMR to be an understudied or  
184 underreported problem.

185 More pharmacists perceived a higher prevalence of AMR in IDPs relative to the general  
186 population (63%, 17/27) compared to physicians (48%, 13/27).

187 Physicians and pharmacists differed in their ranked perception of solutions to the high burden  
188 of AMR in Yemen. Physicians were more (37%, 10/27) in support of the enforcement of  
189 prescription laws – sale of antimicrobials without prescription – and increased training (30%,  
190 8/27) than in increasing awareness among clients (22%, 6/27). On the other hand,  
191 pharmacists were more in support of increased training (59%, 16/27) and increased  
192 awareness among clients (22%, 6/27), than enforcement of prescription laws (15%, 4/27).

193 Interestingly, both ranked the use of AST the lowest – only 11% (3/27) of physicians and 4%  
194 (1/27) of pharmacists reported increased testing for susceptibility as an approach to tackling  
195 AMR.

196

#### 197 Antibiotic utilization – prescribing/dispensing practices and major antibiotics

198 Most physicians (74%, 20/27) reported that they felt under pressure to prescribe broad-  
199 spectrum versus narrow-spectrum antibiotics.

200 There were multiple reasons for empirical treatment with antibiotics with the major ones  
201 being cost (59%, 16/27) and symptoms of patient (56%, 15/27); and for antibiotic choice,  
202 with availability, and broad-spectrum nature (52%, 14/27), respectively being the main  
203 reasons. Other reasons for empirical treatment and antibiotic choice were identification (from  
204 signs and symptoms) of bacterial infection (41%, 11/27) and convenience (11%, 3/27).

205 The practice of selling antibiotic without a prescription was reported by most pharmacists  
206 (67%, 18/27) as with counter-prescribing (63%, 17/27). The conditions for which antibiotics  
207 were demanded or counter-prescribed were: inflammation affecting the throat/mouth or ear  
208 (37%, 10/27), followed by infections – Urinary Tract Infections (UTIs) and Respiratory Tract  
209 Infections (RTIs) (33%, 9/27, each) and fever with other symptoms (11%, 3/27).

210 The most important consideration for dispensing of antibiotics by pharmacists were: disease  
211 (62%, 16/27); price patient can afford (22%, 6/27) and cost (15%, 4/27).

212 Penicillins were the most commonly-prescribed and dispensed antibiotic group, followed by  
213 quinolones, macrolides and tetracyclines. Of the penicillins, amoxicillin (and  
214 amoxicillin/clavulanic acid) were the most commonly prescribed (63%, 17/27) by physicians  
215 or dispensed (82%, 22/27) by pharmacists. Ciprofloxacin was the most common quinolone  
216 antibiotic prescribed (52%, 14/27) or dispensed (74%, 20/27). There was more community  
217 dispensing of macrolides, with pharmacies dispensing more of erythromycin (26%, 7/27)  
218 than the healthcare facilities (19%, 5/27), and with azithromycin dispensed only by  
219 pharmacists (15%, 4/27). Similarly, the dispensing of tetracyclines was reported only in  
220 pharmacies (15%, 4/27).

221 By comparison, cephalosporins were not as commonly prescribed or dispensed. Physicians  
222 reported 22% (6/27) of prescribed ceftriaxone – similar to pharmacists, and 11% (3/27) for  
223 other cephalosporins compared to 4% (1/27) pharmacists.

#### 224 Antimicrobial stewardship

225 In terms of capacity to perform AST, two-thirds, 67% (18/27), reported the possibility of  
226 performing AST at their facilities: most (56%, 10/18) could do so on site. In the majority of  
227 cases (81%, 22/27), however, AST was not performed to inform choice of antibiotics.

228 The major barriers to the routine use of AST were cost, availability and waiting time for AST  
229 results. The average cost of one AST in Yemen is estimated at between 3,500 – 5,000  
230 Yemeni Rial (Key informant), equivalent to USD14-20.<sup>39</sup> Even allowing for a lower 6-month  
231 average exchange rate of 600 Rial to 1 USD, the cost is USD6-9. At a daily wage of  
232 USD3.39 in 2017, amidst delayed salary payments and inflation, the cost of one AST is  
233 prohibitive for three-thirds of the population who live below the poverty line (USD1.9) in  
234 2020.<sup>40-42</sup> This is in addition to poor access to laboratory facilities and equipment (Key  
235 informant, 2020).

236 Prescribing guides were available only in 30% (8/27) of health workers' practices, though  
237 most participants, 70% (19/27), reported that their facility had a Medicines Formulary. Less  
238 than one-fifth, 19% (5/27), reported that their facilities had a DTC. There is no antibiotic  
239 policy for Yemen (Key informant, 2020).

240 The key findings from the survey are summarized in Figure 1.

241

242

## 243 **Discussion**

244 AMR is correlated with an increase in the consumption of antimicrobials.<sup>43-46</sup> The  
245 containment of AMR requires a complete understanding of all factors promoting misuse. This  
246 mixed-methods study provides current knowledge of individual-level (awareness and  
247 practices) as well as contextual factors related to AMR and stewardship in Yemen – a low-  
248 income country in conflict since 2015. There are three salient findings:

- 249 • Awareness of a high AMR prevalence rate,
- 250 • Inappropriate use of antibiotics, and
- 251 • Overall sub-optimal AMS activities, including low prioritization and cost of AST.

### 252 **AMR prevalence: perception and solutions**

253 The high level of AMR in Yemen perceived by participants indicates awareness among  
254 physicians and pharmacists, considered frontline health workers, in this survey and is  
255 corroborated by the earlier mentioned studies reporting laboratory investigations.<sup>24-30</sup>

256 In Yemen, IDPs may not necessarily be distinguished from the non-displaced. Since 2020,  
257 displacement has been more marked among four, out of a total of 22 governorates (*Marib, Al*  
258 *Hudaydah, Al Dhale'e, Taizz, and Al Jawf*) – mostly in the north – with the greater proportion  
259 moving in with relatives or other non-family hosts, rather than into any settlement camps.<sup>47</sup>  
260 IDPs, as they experience the same conditions as their hosts, would, thus, be hypothesized, or  
261 expected, to have the same risks, or prevalence, of AMR as the general population, as the  
262 results also seem to suggest.

263 The difference in the ranking by physicians and pharmacists of solutions to the perceived  
264 high burden of AMR in Yemen may reflect differential clinical training and practice

265 environments as well as highlight training needs or gaps.<sup>48,49</sup> In this, our findings are in line  
266 with a previous 2016 study among healthcare workers (physicians, pharmacists and nurses)  
267 assessing awareness of AMR, possible contributory factors, as well as solutions.<sup>49</sup>

268 Interestingly, despite the level of awareness, both professionals surveyed in our study ranked  
269 the use of AST as the least important solution to the problem of AMR in Yemen.

## 270 **Antimicrobial utilization**

### 271 *Prescription and dispensing practices*

272 Antibiotic prescribing is a complex activity heavily influenced by contextual individual,  
273 social and policy factors, creating ethical dilemmas.<sup>50</sup> Physicians may feel obligated to  
274 prescribe antibiotics both in response to direct patients' demand and, on the need, to induce  
275 rapid relief of symptoms. Both of these, as shown in a systematic review by Rodrigues et al  
276 (2013) on physician prescribing behavior, can create a state of tension or fear – one of several  
277 factors leading to irrational prescribing.<sup>51</sup> While the extent to which pressure to prescribe  
278 broad-spectrum antibiotics for symptom relief may be related to actual need, for instance  
279 infected war-wounds, was not investigated, patients' demand for antibiotics when not  
280 clinically indicated is well documented in the literature.

281 Failure to prescribe antibiotics when demanded could lead the patient to other physicians  
282 willing to do so, or to pharmacists. Hence, this culture is perpetuated. This is common in  
283 many geographical regions. As one approach to reduce patient demand, the United Kingdom  
284 (UK) mounted a patient awareness campaign to create awareness among the lay population  
285 that not all colds require an antibiotic as well as institute stricter prescribing guidelines such  
286 that General Practitioners would not prescribe an antibiotic for acute upper RTIs, including  
287 cough, common cold, acute pharyngitis, tonsillitis and otitis media, except for the  
288 systematically very unwell or with high risk of complications.<sup>52,53</sup> Generally, educational  
289 interventions aimed at creating awareness among clinicians and the public alike have been  
290 shown to reduce irrational prescribing, especially for RTIs.<sup>54</sup>

291 In resource-limited settings, affordability – the price a patient can pay for their medicines –  
292 also affects prescribing pattern. This is the case in this study, where physicians reported cost  
293 as a major factor both in the choice of antibiotics and in empirical treatment, creating another  
294 layer of complexity.

295 There was pharmacy sale and counter-prescribing of antimicrobials, in common with many  
296 others countries especially in the global south, and as previously documented for Yemen.<sup>55,56</sup>  
297 In these contexts, pharmacies are usually the first port-of-call for clients with minor ailments,  
298 and, thus, serve an important public health function. Our results conform with a 2014 study  
299 by Belkina et al in which 78.2% (n=400) teachers indicated having obtained a non-prescribed  
300 antibiotic.<sup>8</sup> The WHO GAP, as one step to containing AMR, recommends the prescription-  
301 only sale of antimicrobials in pharmacies and medicine outlets. However, in the global north,  
302 the role of the pharmacist is evolving to include the prescription of medicines, with some  
303 evidence of their impact in decreasing irrational prescribing in hospitals.<sup>57</sup> Enhancing their  
304 capacity by equipping private pharmacies in LMICs with rapid diagnostic devices, including  
305 the use of mobile-based decision-making algorithms, could leverage this professional  
306 capacity in the containment of AMR.<sup>58</sup> Using these tools, pharmacists can, for example,  
307 screen bacterial from viral infections, and advise clients with viral infections including the



308 common cold more appropriately on the choice of medicines, and whether or not antibiotics  
309 are required. These tools should also be available at healthcare facilities.<sup>25</sup>

### 310 *Consumption pattern and AMR*

311 Amoxicillin (including amoxicillin/clavulanic acid), a penicillin, was the most commonly  
312 prescribed or dispensed antibiotic among the participants. This corresponds with results from  
313 several studies assessing antimicrobial utilization in the community in Yemen.<sup>59-61</sup> In  
314 addition, it mirrors the high usage of this antibiotic in the greater Middle Eastern region.<sup>1</sup> In  
315 Yemen, ciprofloxacin is the first choice antibiotic treatment for several infections including  
316 UTIs and gastrointestinal infections including typhoid.<sup>24</sup> Both of these antibiotics were for  
317 oral use, with amoxicillin a preferred choice in susceptible RTIs, especially in children, as  
318 contained in the national EML and guidelines for child health programs in Yemen which is  
319 widely supported by international organizations.

320 In a recent study of AMR in Aden, Yemen, by Badulla et al (2020), the resistance to  
321 amoxicillin/clavulanic acid among seven bacterial species isolated from various clinical  
322 specimens – urine, pus and wound – was an average of 65.2%.<sup>24</sup> This study raises questions  
323 about the continued efficacy of amoxicillin and amoxicillin/clavulanic acid in Yemen.

324 Resistance against ceftriaxone, the most commonly prescribed/dispensed cephalosporin in  
325 this survey, was also fairly high at about 62% of microorganisms in their study. In contrast,  
326 resistance to ciprofloxacin was relatively low at about 26%.

327 This study by Badulla et al., while limited to Aden and, therefore, potentially not  
328 generalizable, might account in part for the treatment failure incidences reported by  
329 participants in this survey. However, a number of other studies conducted in other parts of  
330 Yemen note high resistance against antibiotics noted as commonly dispensed by the survey  
331 conducted.<sup>25,26,28-30</sup> For instance, a study from Sana'a found that clinical isolates of *E. coli*  
332 collected in 2017 were 96% resistant to amoxicillin-clavulanic acid<sup>29</sup> and another study from  
333 *Al-Mukalla* found UTI *E. coli* isolates from 2003-2006 were 78.8% resistant to penicillin and  
334 73.1% resistant to cephalosporins.<sup>26</sup>

335 Other possible reasons for treatment failure may include the use of SF medicines, non-  
336 compliance with recommended dosages and the empirical use of broad-spectrum antibiotics.  
337 The prevalence of poor-quality medicines is thought to be high<sup>63</sup> and have been estimated by  
338 various sources to be between 10-60% in Yemen.<sup>64</sup> As part of its pharmacovigilance, Yemen  
339 collects information on suspected therapeutic failure due to poor-quality medicines. Current  
340 pharmacovigilance reports on poor-quality antimicrobials put this at <0.012% (Key  
341 informant, 2020).

342 The potential to induce AMR differ according to antibiotic, with the broad-spectrum  
343 macrolides and fluoroquinolones being among the most potent inducers (fluoroquinolones  
344 can induce AMR even with a single use). The AWaRe classification aims to reduce the use of  
345 potent inducers – Watch/Reserve antibiotics – or last choice antibiotics – Reserve – to only  
346 serious cases of infection resistant to the Access group of antibiotics. One target of this  
347 classification is to increase the use of Access antibiotics, such as penicillins, to 60% by 2050,  
348 as one approach to tackling AMR. In this regard, the results of this survey, in almost equal  
349 proportions, is both encouraging and concerning.

## 350 **Antimicrobial stewardship**

351 Overall, the use of AST to identify resistance and to better guide the prescription process was  
352 sub-optimal. While there was capacity to perform AST in the majority of the facilities where  
353 the surveyed physicians' practice, routine use to guide the choice of antimicrobial agent was  
354 limited and, in some cases, non-existent. Physicians rather prescribed antibiotics based on  
355 clinical and financial considerations, with preference for a broad-spectrum antibiotic. This  
356 preference for initial (empirical) treatment with a broad-spectrum antibiotic is possibly  
357 informed by the perception of an assumed (pre)existing antibiotic resistance to first-line  
358 antibiotics in patients. The irrational prescribing of antibiotics potentially leading to AMR  
359 has been described for public hospitals in Yemen, including up to several antibiotics at one  
360 time, as also found from this study.<sup>65</sup>

361 In recognition of the high levels of AMR among certain impacted populations in its health  
362 facilities in conflict-affected countries in this region, the MSF routinely use AST including  
363 rapid diagnostics and has developed a propriety field device to facilitate AST.<sup>5,66</sup> However,  
364 the challenges in both the development and deployment of these devices, and of AST in  
365 certain contexts, must be acknowledged.<sup>67</sup>

366 Facilitators to increase the uptake of AST might include: increased access to quality-assured  
367 AST kits or equipment and consumables including media for both aerobic and aerobic  
368 bacteria; and capacity increase and training for laboratory personals, as well as logistical  
369 support. Development partners could play a role here in increasing access to AST including  
370 rapid diagnostics, through subsidies.

371 Other structures to ensure AMS were also sub-optimal. Many facilities lacked prescribing  
372 guides. The majority had no DTC – an institutional mechanism for ensuring the rational use  
373 of medicines, including antibiotics, in a healthcare facility – though most had a Medicines  
374 Formulary. These results are in line with a previous survey on AMS in health facilities in  
375 Yemen.<sup>68</sup> Educational interventions to increase the use of AST among professionals,  
376 including of AMS in community pharmacies may be needed to address the observed AMS  
377 gaps.<sup>69</sup> Actively promoting AST use in pharmacies as collaborative efforts aimed at AMR  
378 containment may also be needed.<sup>70,71</sup>

379

380 Limitation: The small sample size of this study limits its generalizability across the country,  
381 as earlier indicated. However, this study advances our understanding of some current  
382 challenges in the country with respect to AMR. There is need for more robust studies.

## 383 **Conclusion**

384 Active conflicts aggregate multiple social determinants promoting irrational use and AMR.  
385 Challenges to AMS in these settings are multifactorial, demanding complete understanding  
386 for containment. This study found that while there is awareness of a high AMR prevalence in  
387 Yemen among health workers surveyed, there was sub-optimal antimicrobial use practices  
388 and AMS. The main barrier to AMS was cost.

389 There is the need for educational/awareness interventions targeting both providers and  
390 consumers of antibiotics to reduce irrational use. Policy changes to the use of amoxicillin as a  
391 preferred antibiotic may be required. There is also a strong need to build AMS structures as a

392 priority. These activities, could be built using the WHO antimicrobial stewardship toolkit as a  
393 guide.<sup>72</sup> Barriers to the use of AST could be addressed through the deployment of low-cost  
394 AST kits. In all aspects, strong international support would be required.

395

### 396 **Acknowledgments**

397 This work was made possible by support from the Boston University Social Innovation on  
398 Drug Resistance (SIDR) Postdoctoral Program to ESFO and the U.S. Pharmacopeial  
399 Convention (USP) Quality Institute to CC.

400

### 401 **Financial Support**

402 We confirm no financial support was received for this project.

403

### 404 **Disclosures regarding real or perceived conflicts of interest.**

405 None to declare.

406

## References

1. World Bank., 2017. *Drug-Resistant Infections: A Threat to Our Economic Future*. Washington, DC
2. Kirchhelle C, Atkinson P, Broom A, Chuengsatiansup K, Ferreira JP, Fortané N, Frost I, Gradmann C, Hinchliffe S, Hoffman SJ, Lezaun J, Nayiga S, Outterson K, Podolsky SH, Raymond S, et al., 2020. Setting the standard: multidisciplinary hallmarks for structural, equitable and tracked antibiotic policy. *BMJ Global Health* 5: e003091
3. Haraoui DL-P., 2019. Armed conflicts and antimicrobial resistance: A deadly convergence. *AMR Control*: 5
4. Abbara A, Rawson TM, Karah N, El-Amin W, Hatcher J, Tajaldin B, Dar O, Dewachi O, Abu Sitta G, Uhlin BE, Sparrow A., 2018. A summary and appraisal of existing evidence of antimicrobial resistance in the Syrian conflict. *International Journal of Infectious Diseases* 75: 26–33
5. Kanapathipillai R, Malou N, Hopman J, Bowman C, Yousef N, Michel J, Hussein N, Herard P, Ousley J, Mills C, Seguin C, Saim M., 2019. Antibiotic resistance in conflict settings: lessons learned in the Middle East. *JAC-Antimicrobial Resistance* 1
6. Collignon P, McEwen S., 2019. One Health—Its Importance in Helping to Better Control Antimicrobial Resistance. *TropicalMed* 4: 22
7. Klein EY, Van Boeckel TP, Martinez EM, Pant S, Gandra S, Levin SA, Goossens H, Laxminarayan R., 2018. Global increase and geographic convergence in antibiotic consumption between 2000 and 2015. *Proc Natl Acad Sci USA* 115: E3463–E3470
8. Belkina T, Al Warafi A, Hussein Eltom E, Tadjieva N, Kubena A, Vlcek J., 2014. Antibiotic use and knowledge in the community of Yemen, Saudi Arabia, and Uzbekistan. *J Infect Dev Ctries* 8: 424–429
9. Nwokike J, Clark A, Nguyen PP., 2018. Medicines quality assurance to fight antimicrobial resistance. *Bulletin of the World Health Organization* 96: 135–137
10. Weinstein ZB, Zaman MH., 2019. Evolution of Rifampin Resistance in Escherichia coli and Mycobacterium smegmatis Due to Substandard Drugs. *Antimicrob Agents Chemother* 63: e01243-18
11. Ramay BM, Caudell MA, Córdón-Rosales C, Archila LD, Palmer GH, Jarquin C, Moreno P, McCracken JP, Rosenkrantz L, Amram O, Omulo S, Call DR., 2020. Antibiotic use and hygiene interact to influence the distribution of antimicrobial-resistant bacteria in low-income communities in Guatemala. *Scientific Reports* 10: 13767
12. WHO., 2020. Antimicrobial resistance. Available at: <https://www.who.int/news-room/fact-sheets/detail/antimicrobial-resistance>. Accessed. 2020
13. WHO., 2019. AWaRe Policy Brief
14. Dau AA, Tloba S, Daw MA., 2013. Characterization of wound infections among patients injured during the 2011 Libyan conflict. *East Mediterr Health J* 19: 356–361
15. Bazzi W, Abou Fayad AG, Nasser A, Haraoui L-P, Dewachi O, Abou-Sitta G, Nguyen V-K, Abara A, Karah N, Landecker H, Knapp C, McEvoy MM, Zaman MH, Higgins PG, Matar GM., 2020. Heavy Metal Toxicity in Armed Conflicts Potentiates AMR in *A. baumannii* by Selecting for Antibiotic and Heavy Metal Co-resistance Mechanisms. *Front Microbiol* 11: 68
16. Kassem DF, Hoffmann Y, Shahar N, Ocampo S, Salomon L, Zonis Z, Glikman D., 2017. Multidrug-Resistant Pathogens in Hospitalized Syrian Children. *Emerg Infect Dis* 23: 166–168
17. Petersen K, Riddle MS, Danko JR, Blazes DL, Hayden R, Tasker SA, Dunne JR., 2007. Trauma-related Infections in Battlefield Casualties From Iraq: *Annals of Surgery* 245: 803–811
18. Älgå A, Wong S, Shoaib M, Lundgren K, Giske CG, von Schreeb J, Malmstedt J., 2018. Infection with high proportion of multidrug-resistant bacteria in conflict-related injuries is associated with poor outcomes and excess resource consumption: a cohort study of Syrian patients treated in Jordan. *BMC Infect Dis* 18: 233
19. Maltezou HC, Theodoridou M, Daikos GL., 2017. Antimicrobial resistance and the current refugee crisis. *J Glob Antimicrob Resist* 10: 75–79
20. United Nations., 2019. Humanitarian crisis in Yemen remains the worst in the world, warns UN. Available at: <https://news.un.org/en/story/2019/02/1032811>. Accessed. February 14, 2019

21. Anon. WHO EMRO | Outbreak update – Cholera in Yemen, 12 January 2020 | Cholera | Epidemic and pandemic diseases. Available at: <http://www.emro.who.int/pandemic-epidemic-diseases/cholera/outbreak-update-cholera-in-yemen-12-january-2020.html>. Accessed
22. United Nations., 2020. Yemeni children suffer record rates of acute malnutrition, putting ‘entire generation’ at risk. Available at: <https://news.un.org/en/story/2020/10/1076272>. Accessed. October 27, 2020
23. Ibrahim MK, Zambruni M, Melby CL, Melby PC., 2017. Impact of Childhood Malnutrition on Host Defense and Infection. *Clin Microbiol Rev* 30: 919–971
24. Badulla WFS, Alshakka M, Mohamed Ibrahim MI., 2020. Antimicrobial Resistance Profiles for Different Isolates in Aden, Yemen: A Cross-Sectional Study in a Resource-Poor Setting. *BioMed Research International* 2020: 1810290
25. AL-Magrami RTF, Al-Shamahy HA., 2019. PSEUDOMONAS AERUGINOSA SKIN-NASOPHARYNGEAL COLONIZATION IN THE IN-PATIENTS: PREVALENCE, RISK FACTORS AND ANTIBIOTIC RESISTANCE IN TERTIARY HOSPITALS IN SANA’A CITY - YEMEN. *Univ J Pharm Res*
26. Al-Haddad AM, Ghouth A, El-Hosseiny M., 2010. Microbial resistance in patients with urinary tract infections in Al-Mukalla, Yemen. *Sudan Journal of Medical Sciences* 5
27. Al-Haroni MH, Skaug N, Al-Hebshi NN., 2006. Prevalence of subgingival bacteria resistant to aminopenicillins and metronidazole in dental patients from Yemen and Norway. *International Journal of Antimicrobial Agents* 27: 217–223
28. Ka A-M, Ns H, Ah A-H, Ha A-S., 2006. Increasing single and multi-antibiotic resistance in Shigella species isolated from shigellosis patients in Sana’a, Yemen. *Saudi Med J* 27: 1157–1160
29. Al-Hammadi MA, Al-Shamahy HA, Ali AQ, Abdulghani MAM, Pyar H, AL-Suboal I., 2020. Class I Integrons in Clinical Multi Drug Resistance E. coli, Sana`a Hospitals, Yemen. *Pakistan J of Biological Sciences* 23: 231–239
30. Banajeh SM., 2001. Bacterial Aetiology and Anti-microbial Resistance of Childhood Diarrhoea in Yemen. *Journal of Tropical Pediatrics* 47: 301–302
31. Anon. Yemen: Going behind the front lines of a hidden war | Doctors Without Borders - USA. Available at: <https://www.doctorswithoutborders.org/what-we-do/news-stories/story/yemen-going-behind-front-lines-hidden-war>. Accessed
32. Nasser A., 2020. COVID-19 in Yemen – A Perfect Storm | Human Rights Watch. Available at: <https://www.hrw.org/news/2020/04/14/covid-19-yemen-perfect-storm>. Accessed. April 14, 2020
33. WHO., 2020. *Global antimicrobial resistance surveillance system (GLASS) report: early implementation 2020*. Geneva: World Health Organization
34. Leech NL, Onwuegbuzie AJ., 2010. Guidelines for Conducting and Reporting Mixed Research in the Field of Counseling and Beyond. *Journal of Counseling & Development* 88: 61–69
35. Hertzog MA., 2008. Considerations in determining sample size for pilot studies. *Res Nurs Health* 31: 180–191
36. Viechtbauer W, Smits L, Kotz D, Budé L, Spigt M, Serroyen J, Crutzen R., 2015. A simple formula for the calculation of sample size in pilot studies. *J Clin Epidemiol* 68: 1375–1379
37. WHO., 2015. Global Action Plan on Antimicrobial Resistance
38. World Health Organization., 2019. *The 2019 WHO AWaRe classification of antibiotics for evaluation and monitoring of use*. World Health Organization
39. XE., 2020. 3500 YER to USD | Convert Yemeni Rials to US Dollars | XE. Available at: <https://www.xe.com/currencyconverter/convert/?Amount=3%2C500&From=YER&To=USD>. Accessed. October 22, 2020
40. World Bank., 2020. Yemen Overview. Available at: <https://www.worldbank.org/en/country/yemen/overview>. Accessed. October 1, 2020
41. World Bank., 2020. *Yemen-Monthly-Economic-Update-April-2020-eng.pdf*
42. Save the Children., 2018. YEMEN: Cost of Food Nearly Doubles, Putting Thousands of Lives at Risk. Available at: <https://www.savethechildren.org/us/about-us/media-and-news/2018-press-releases/yeme-cost-of-food-nearly-doubles>. Accessed. 2018
43. Davies J, Davies D., 2010. Origins and evolution of antibiotic resistance. *Microbiol Mol Biol Rev* 74: 417–433

44. Olesen SW, Barnett ML, MacFadden DR, Brownstein JS, Hernández-Díaz S, Lipsitch M, Grad YH., 2018. The distribution of antibiotic use and its association with antibiotic resistance. *eLife* 7
45. Van Boeckel TP, Pires J, Silvester R, Zhao C, Song J, Criscuolo NG, Gilbert M, Bonhoeffer S, Laxminarayan R., 2019. Global trends in antimicrobial resistance in animals in low- and middle-income countries. *Science* 365: eaaw1944
46. Kimera ZI, Mshana SE, Rweyemamu MM, Mboera LEG, Matee MIN., 2020. Antimicrobial use and resistance in food-producing animals and the environment: an African perspective. *Antimicrob Resist Infect Control* 9: 37
47. International Displacement Monitoring Centre., 2020. Yemen. Available at: <https://www.internal-displacement.org/countries/yemen>. Accessed. 2020
48. Ali Al-Worafi YM., 2016. Chapter 14 - Pharmacy Practice in Yemen. Fathelrahman AI, Ibrahim MIM, Wertheimer AI, eds. *Pharmacy Practice in Developing Countries*. Boston: Academic Press, 267–287
49. Halboup A, Alzoubi K, Othman G., 2018. Awareness of Bacterial Resistance to Antibiotics among Healthcare Providers in Sana'a City, Yemen. *YJMS* 12: 12–21
50. Basu S, Garg S., 2018. Antibiotic prescribing behavior among physicians: ethical challenges in resource-poor settings. *J Med Ethics Hist Med* 11: 5
51. Teixeira Rodrigues A, Roque F, Falcão A, Figueiras A, Herdeiro MT., 2013. Understanding physician antibiotic prescribing behaviour: a systematic review of qualitative studies. *International Journal of Antimicrobial Agents* 41: 203–212
52. Centre for Clinical Practice at NICE (UK)., 2008. *Respiratory Tract Infections - Antibiotic Prescribing: Prescribing of Antibiotics for Self-Limiting Respiratory Tract Infections in Adults and Children in Primary Care*. London: National Institute for Health and Clinical Excellence (UK)
53. NICE., 2020. *Summary of antimicrobial prescribing guidance – managing common infections*. Public Health England
54. Cross ELA, Tolfree R, Kipping R., 2017. Systematic review of public-targeted communication interventions to improve antibiotic use. *Journal of Antimicrobial Chemotherapy* 72: 975–987
55. Halboup A, Abdi A, Ahmed M, Al-Qadasi F, Othman GQ., 2020. Access to antibiotics without prescription in community pharmacies in Yemen during the political conflict. *Public Health* 183: 30–35
56. Sj S, R N, R N, F K, Sa R., 2019. Self-medication with antibiotics in WHO Eastern Mediterranean Region: A Systematic Review and Meta-analysis
57. Sakeena MHF, Bennett AA, McLachlan AJ., 2018. Enhancing pharmacists' role in developing countries to overcome the challenge of antimicrobial resistance: a narrative review. *Antimicrobial Resistance & Infection Control* 7: 63
58. Gubbins PO, Klepser ME, Adams AJ, Jacobs DM, Percival KM, Tallman GB., 2017. Potential for Pharmacy-Public Health Collaborations Using Pharmacy-Based Point-of-Care Testing Services for Infectious Diseases. *J Public Health Manag Pract* 23: 593–600
59. Alshakka M, Said K, Babakri M, Ansari M, Aldhubhani A, Azmi Hassali M, Mohamed Ibrahim MI., 2016. A Study on Antibiotics Prescribing Pattern at Outpatient Department in Four Hospitals in Aden-Yemen. *JPPCM* 2: 88–93
60. Alfadly S, Ballaswad MR, Amra AS, Alghadeer SM, Wajid S, Al-Arifi MN, Babelghaith SD., 2017. Self-Medication with Antibiotic amongst Adults Attending Community Pharmacies in Mukalla District, Yemen. *Latin American Journal of Pharmacy*: 6
61. Mohanna M., 2010. Self-medication with Antibiotic in Children in Sana'a City, Yemen. *Oman Med J* 25: 41–43
62. Alghadeer S, Aljuaydi K, Babelghaith S, Alhammad A, Alarifi MN., 2018. Self-medication with antibiotics in Saudi Arabia. *Saudi Pharmaceutical Journal* 26: 719–724
63. Diack A, Seiter A, Hawkins L, Dweik IS. Assessment of Governance and Corruption in the Pharmaceutical Sector. : 42
64. Alshakka M, Mohamed Ibrahim MI, Bahattab A, Badulla WFS, Shankar PR., 2020. An insight into the pharmaceutical sector in Yemen during conflict: challenges and recommendations. *Medicine, Conflict and Survival* 36: 232–248
65. Mohamed Ibrahim MI, Alshami AK, Abdorabbo A., 2011. The quality of prescriptions with antibiotics in Yemen. *J Clin Diagnostic Res* 5: 808–12

66. MSF., 2020. MSF Mini-lab project | Médecins Sans Frontières Access Campaign. Available at: <https://msfaccess.org/msf-mini-lab-project>. Accessed. 2020
67. Hays JP, Mitsakakis K, Luz S, van Belkum A, Becker K, van den Bruel A, Harbarth S, Rex JH, Simonsen GS, Werner G, Di Gregori V, Lüdke G, van Staa T, Moran-Gilad J, Bachmann TT, et al., 2019. The successful uptake and sustainability of rapid infectious disease and antimicrobial resistance point-of-care testing requires a complex “mix-and-match” implementation package. *Eur J Clin Microbiol Infect Dis* 38: 1015–1022
68. Alshakka M, Badulla WF, Alawi S, Al-abd N, Mahmoud MA, Alahmadi Y, Wajid S, Attef O., 2020. Status of Antimicrobial Stewardship in Hospitals in Aden, Yemen. *LATIN AMERICAN JOURNAL OF PHARMACY* 39: 936–943
69. Alshakka M, Badulla WF, Bahattab A, Al-Abd N, Mahmoud MA, Alahmadi Y, Wajid S, Attef O., 2019. Perception and practices of antimicrobial stewardship by community pharmacists in Aden-Yemen. *Biomedical Research* 30
70. Dickerson LM, Mainous AG, Carek PJ., 2000. The pharmacist’s role in promoting optimal antimicrobial use. *Pharmacotherapy* 20: 711–723
71. Weber NC, Klepser ME, Akers JM, Klepser DG, Adams AJ., 2016. Use of CLIA-waived point-of-care tests for infectious diseases in community pharmacies in the United States. *Expert Rev Mol Diagn* 16: 253–264
72. WHO., 2019. *Antimicrobial stewardship programmes in health-care facilities in low- and middle-income countries: a WHO practical toolkit*

a. Do you think antibiotic resistance is a problem in Yemen?

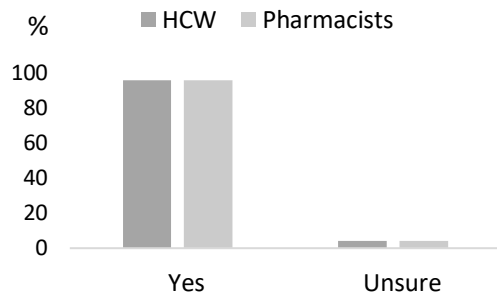

b. Do you think IDPs have a higher risk of antibiotic resistance compared to the population that has not been displaced?

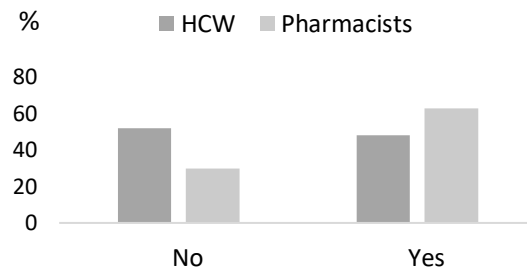

c. How do you suggest the problem of antibiotic resistance can be tackled in Yemen?

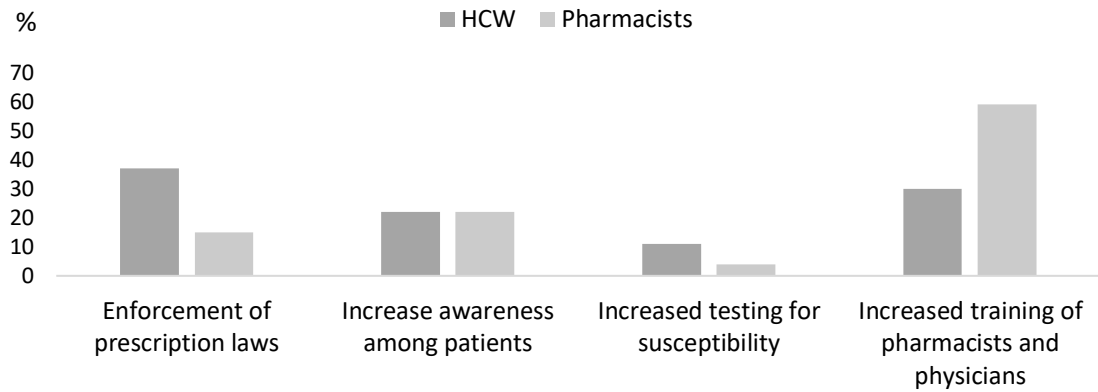

d. Reasons for choice of empirical treatment or antibiotic selection

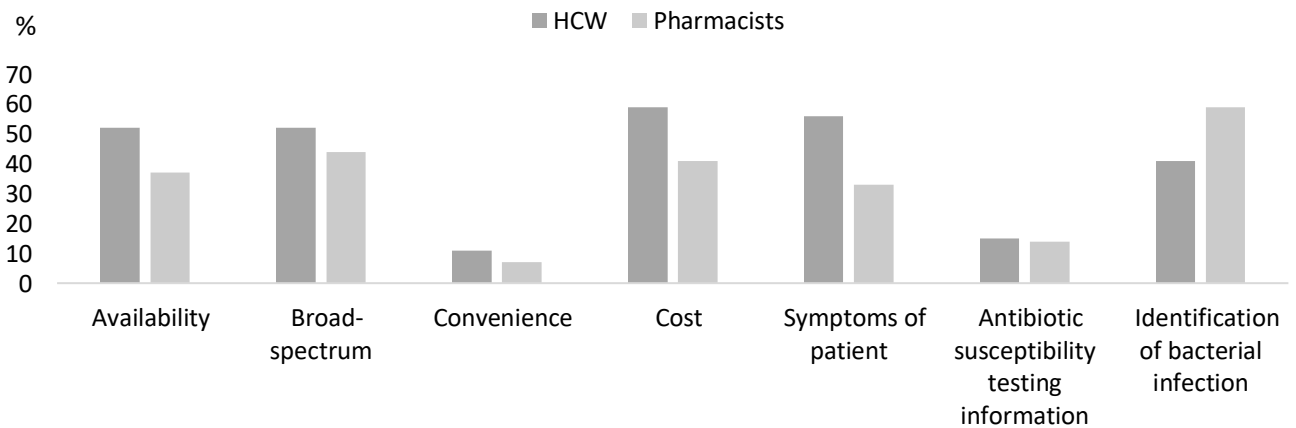

1  
2

3  
4

5  
6



f. Which of these antibiotics are the most commonly dispensed or prescribed? (%)

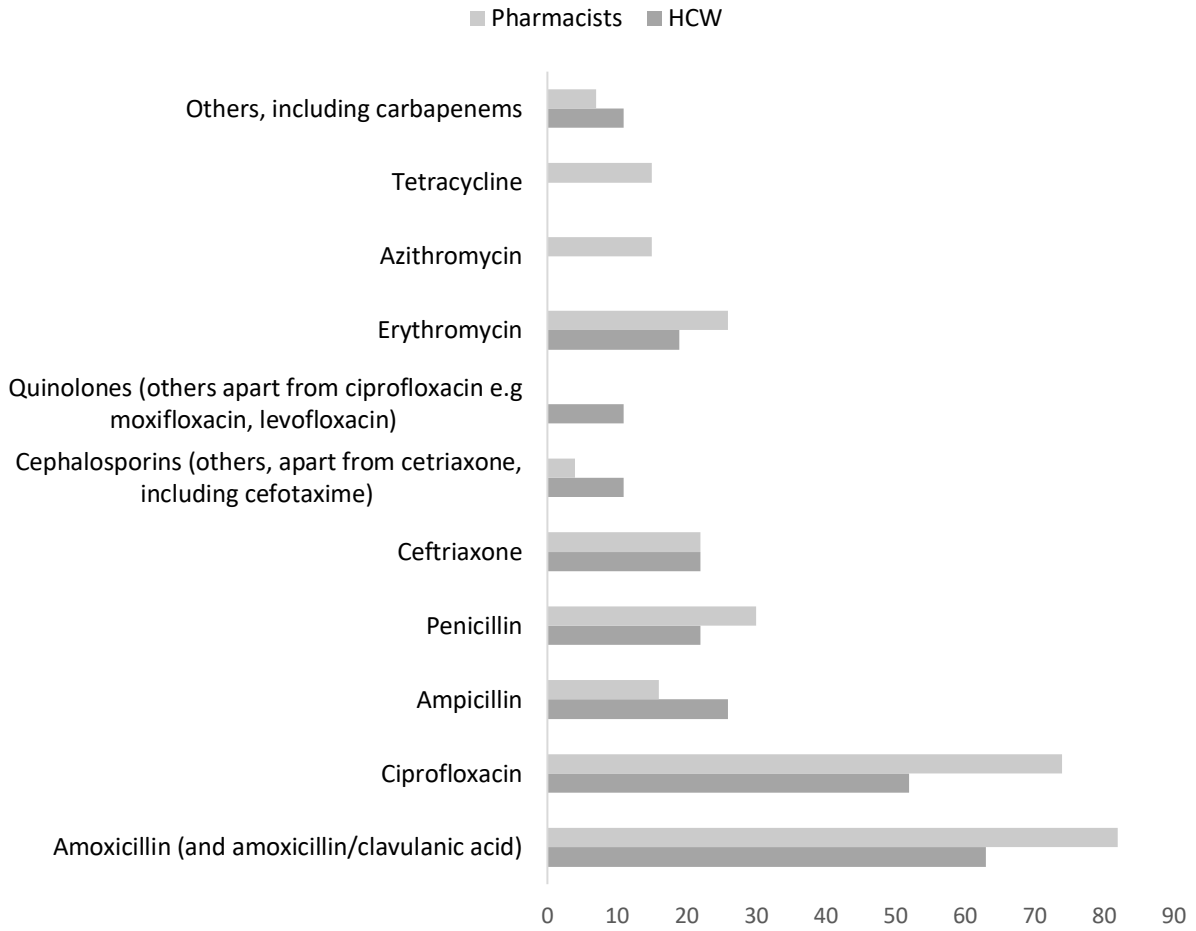

7

8

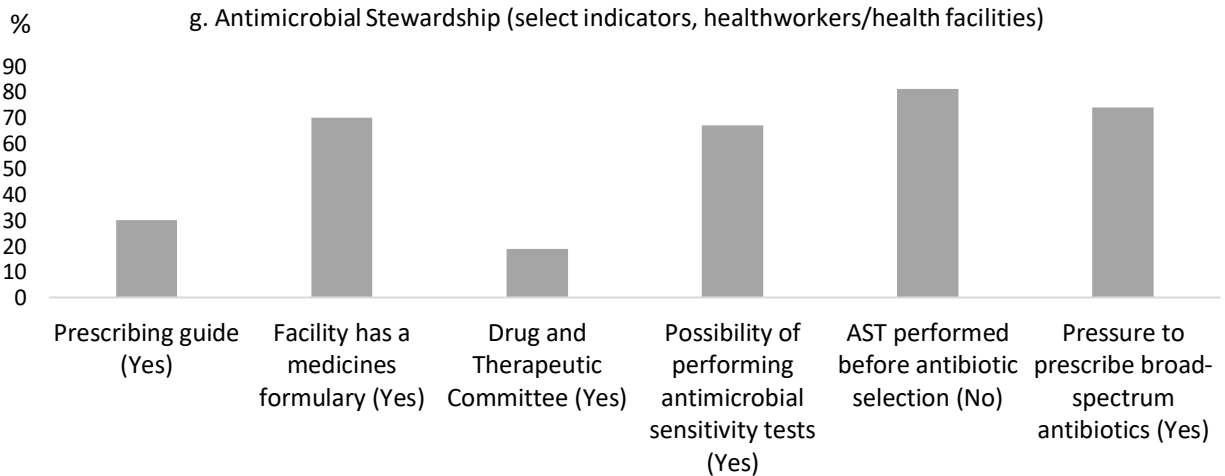

9

10

h. Reasons for HCWs not using antimicrobial sensitivity testing to guide antibiotic choice, %

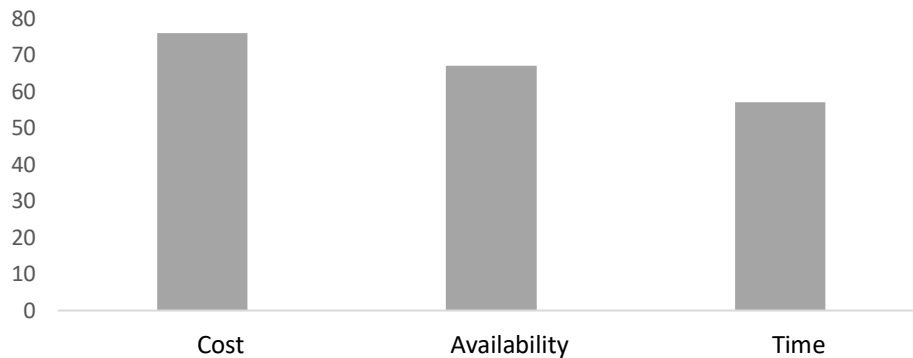

11

12

13

14 Figure 1. Summary of select results from a survey assessing antimicrobial resistance, use and  
15 stewardship in healthcare workers (HCW) and pharmacists in Yemen.

16 a-c. Antimicrobial Resistance (AMR): The majority of respondents (96%) thought AMR to be a problem in  
17 Yemen (a); but were more split in terms of if IDPs had the greater risk (b). Among solution options to  
18 tackling AMR, both respondents ranked the use of increased antimicrobial sensitivity testing the lowest  
19 and ranked increased training of pharmacists and physicians (HCW) the highest.

20 d-f. Antimicrobial Use: There were several overlapping reasons for choice of empirical treatment or  
21 empirical antibiotic selection both in prescribing physicians and dispensing pharmacists with cost (price  
22 patient can afford), signs and symptoms (including “identification of bacterial infection”) of patient and  
23 availability with a preference for broad spectrum antibiotics. In terms of antibacterial agents, amoxicillin  
24 (including amoxicillin/clavulanic acid) was the most commonly prescribed (63%, n=27) or dispensed  
25 (82%, n=27) followed by ciprofloxacin (52%, n=27, prescribed by HCW; 74%, n=27, dispensed by  
26 pharmacists).

27 g-h. Antimicrobial Stewardship: Among select criteria, physicians reported to be under pressure to  
28 prescribe broad-spectrum antibiotics (74%, n=27), and even where there was the possibility to perform  
29 antimicrobial sensitivity tests (AST) in 67% (n=27) of facilities, these were not used to guide prescribing  
30 in the majority (81%, n=27) of cases. The reason for this was largely (74%, n=27) cost (h).

31
